# Supplementary material for: Social Capital, Income Loss, and Psychobehavioral Responses amid COVID-19: A Population-Based Analysis
Source: MDPI journal article supplement (doi:10.3390/ijerph17238888), 2020-11-29
Supplement: s1 [file s1]

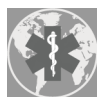

## Supplementary Material 1

**Table S1.** Multivariable logistic regression examining the associations of social capital with probable depression and adoption of preventive behaviors among respondents aged 18 or above (n = 2921).

|                                | Probable depression <sup>1</sup> | Use face masks     | Wash hands more often | Avoid contact with people with respiratory symptoms | Avoid going to crowded places |
|--------------------------------|----------------------------------|--------------------|-----------------------|-----------------------------------------------------|-------------------------------|
|                                | aOR (95% CI)                     | aOR (95% CI)       | aOR (95% CI)          | aOR (95% CI)                                        | aOR (95% CI)                  |
| Gender                         |                                  |                    |                       |                                                     |                               |
| Male                           | 1.0                              | 1.0                | 1.0                   | 1.0                                                 | 1.0                           |
| Female                         | 1.51 (1.24–1.83)***              | 1.71 (1.04–2.82)*  | 2.46 (1.82–3.32)***   | 1.59 (1.34–1.89)***                                 | 1.78 (1.47–2.15)***           |
| Age                            |                                  |                    |                       |                                                     |                               |
| 18–24                          | 1.0                              | 1.0                | 1.0                   | 1.0                                                 | 1.0                           |
| 25–34                          | 1.14 (0.80–1.63)                 | 0.17 (0.04–0.82)*  | 1.01 (0.55–1.84)      | 1.01 (0.70–1.46)                                    | 1.34 (0.93–1.93)              |
| 35–44                          | 1.09 (0.74–1.60)                 | 0.40 (0.07–2.29)   | 1.12 (0.59–2.11)      | 0.73 (0.50–1.07)                                    | 1.70 (1.14–2.53)*             |
| 45–54                          | 0.85 (0.57–1.26)                 | 0.19 (0.04–0.96)*  | 1.22 (0.64–2.31)      | 0.55 (0.38–0.81)**                                  | 1.45 (0.97–2.16)              |
| 55–64                          | 0.80 (0.54–1.20)                 | 0.13 (0.03–0.64)*  | 0.76 (0.42–1.38)      | 0.48 (0.33–0.70)***                                 | 1.32 (0.89–1.97)              |
| 65 or above                    | 0.93 (0.62–1.40)                 | 0.11 (0.02–0.51)** | 0.95 (0.51–1.78)      | 0.51 (0.35–0.75)**                                  | 1.36 (0.89–2.07)              |
| Marital status                 |                                  |                    |                       |                                                     |                               |
| Married                        | 1.0                              | 1.0                | 1.0                   | 1.0                                                 | 1.0                           |
| Unmarried/divorced/<br>widowed | 1.39 (1.12–1.72)**               | 0.82 (0.48–1.40)   | 0.81 (0.58–1.12)      | 0.81 (0.67–0.99)*                                   | 0.91 (0.73–1.14)              |
| Education level                |                                  |                    |                       |                                                     |                               |
| Tertiary or above              | 1.0                              | 1.0                | 1.0                   | 1.0                                                 | 1.0                           |
| Secondary                      | 1.34 (1.07–1.66)*                | 0.64 (0.35–1.18)   | 0.37 (0.26–0.53)***   | 0.59 (0.48–0.72)***                                 | 0.66 (0.53–0.83)***           |
| Primary or below               | 1.61 (1.09–2.39)*                | 0.62 (0.26–1.48)   | 0.29 (0.16–0.50)***   | 0.41 (0.29–0.58)***                                 | 0.40 (0.27–0.60)***           |

|                                 |                     |                    |                    |                     |                    |
|---------------------------------|---------------------|--------------------|--------------------|---------------------|--------------------|
| Employment                      |                     |                    |                    |                     |                    |
| Employed                        | 1.0                 | 1.0                | 1.0                | 1.0                 | 1.0                |
| Dependent                       | 1.13 (0.88–1.45)    | 0.52 (0.26–1.05)   | 0.84 (0.57–1.24)   | 1.10 (0.87–1.39)    | 1.59 (1.22–2.07)** |
| Unemployed                      | 1.78 (1.18–2.68)**  | 0.35 (0.13–0.93)*  | 0.96 (0.49–1.87)   | 1.21 (0.78–1.88)    | 1.22 (0.76–1.95)   |
| Monthly household income (HK\$) |                     |                    |                    |                     |                    |
| \$80,000 or above               | 1.0                 | 1.0                | 1.0                | 1.0                 | 1.0                |
| \$60,000–\$79,999               | 0.87 (0.54–1.38)    | 0.84 (0.26–2.73)   | 0.75 (0.36–1.59)   | 0.79 (0.54–1.16)    | 0.67 (0.44–1.03)   |
| \$40,000–\$59,999               | 1.68 (1.19–2.37)**  | 0.74 (0.29–1.89)   | 0.59 (0.32–1.06)   | 0.78 (0.57–1.06)    | 0.64 (0.45–0.90)*  |
| \$20,000–\$39,999               | 1.65 (1.18–2.30)**  | 0.96 (0.39–2.40)   | 0.64 (0.36–1.13)   | 0.61 (0.45–0.81)**  | 0.58 (0.42–0.81)** |
| \$19,999 or below               | 1.54 (1.08–2.21)*   | 0.99 (0.39–2.49)   | 0.58 (0.32–1.05)   | 0.60 (0.44–0.83)**  | 0.58 (0.40–0.83)** |
| Income change                   |                     |                    |                    |                     |                    |
| Gain/No change                  | 1.0                 | 1.0                | 1.0                | 1.0                 | 1.0                |
| Loss                            | 1.35 (1.11–1.65)**  | 1.25 (0.71–2.20)   | 1.07 (0.79–1.47)   | 1.24 (1.03–1.50)*   | 1.30 (1.05–1.60)*  |
| Social capital                  |                     |                    |                    |                     |                    |
| Presence of interpersonal trust | 1.0                 | 1.0                | 1.0                | 1.0                 | 1.0                |
| Lack of interpersonal trust     | 1.53 (1.24–1.88)*** | 0.67 (0.38–1.15)   | 0.84 (0.61–1.16)   | 1.28 (1.05–1.56)*   | 0.95 (0.77–1.17)   |
| Presence of social harmony      | 1.0                 | 1.0                | 1.0                | 1.0                 | 1.0                |
| Lack of social harmony          | 1.17 (0.96–1.44)    | 1.4 (0.81–2.42)    | 1.10 (0.81–1.51)   | 0.92 (0.77–1.11)    | 0.95 (0.77–1.16)   |
| Presence of sense of belonging  | 1.0                 | 1.0                | 1.0                | 1.0                 | 1.0                |
| Lack of sense of belonging      | 2.58 (1.68–3.96)*** | 0.31 (0.13–0.74)** | 0.41 (0.22–0.74)** | 0.44 (0.29–0.69)*** | 0.57 (0.36–0.91)*  |

<sup>1</sup> Scores of 10 or above in the 9-item Patient Health Questionnaire (PHQ-9) were used to define probable depression. aOR, adjusted odds ratio. CI, confidence interval. \*  $p < 0.05$ , \*\*  $p < 0.01$ ,

\*\*\*  $p < 0.001$

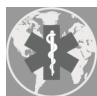

**Table S2.** Interaction effects of social capital and income change on probable depression and adoption of preventive behaviors among respondents aged 18 or above (n = 2921).

| Outcomes                                            | Interaction terms                   | <i>p</i> value |
|-----------------------------------------------------|-------------------------------------|----------------|
| Probable depression                                 | Interpersonal trust × Income change | 0.949          |
|                                                     | Social harmony × Income change      | 0.043          |
|                                                     | Sense of belonging × Income change  | 0.314          |
| Use face masks                                      | Interpersonal trust × Income change | 0.340          |
|                                                     | Social harmony × Income change      | 0.041          |
|                                                     | Sense of belonging × Income change  | 0.340          |
| Wash hands more often                               | Interpersonal trust × Income change | 0.161          |
|                                                     | Social harmony × Income change      | 0.331          |
|                                                     | Sense of belonging × Income change  | 0.461          |
| Avoid contact with people with respiratory symptoms | Interpersonal trust × Income change | 0.154          |
|                                                     | Social harmony × Income change      | 0.991          |
|                                                     | Sense of belonging × Income change  | 0.450          |
| Avoid going to crowded places                       | Interpersonal trust × Income change | 0.850          |
|                                                     | Social harmony × Income change      | 0.296          |
|                                                     | Sense of belonging × Income change  | 0.535          |
